# Supplementary material for: Protective Effects of Wine Polyphenols on Oxidative Stress and Hepatotoxicity Induced by Acrylamide in Rats
Source: MDPI journal article supplement (doi:10.3390/antiox11071347), 2022-07-10
Supplement: s1 [file antioxidants-1789000-supplementary.pdf › antioxidants-1789000-supplementary.pdf]

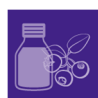

## Supplementary Materials

## 1. Figures

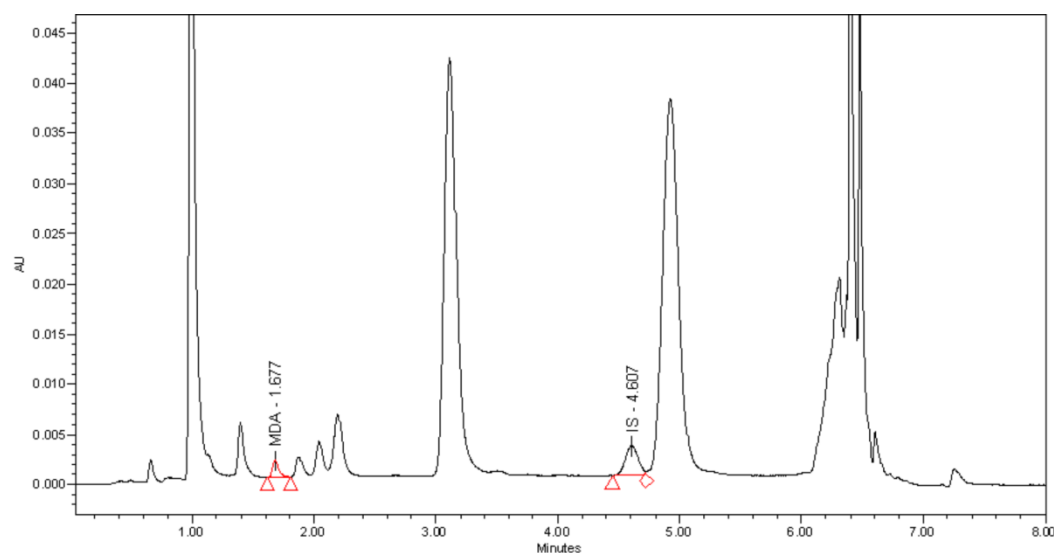

**Figure S1.** Chromatogram of a rat plasma sample from RW group for determination of MDA. RW – red wine group (FN<sub>Toh2010</sub> red wine (7 mL/kg/day)). IS – internal standard.

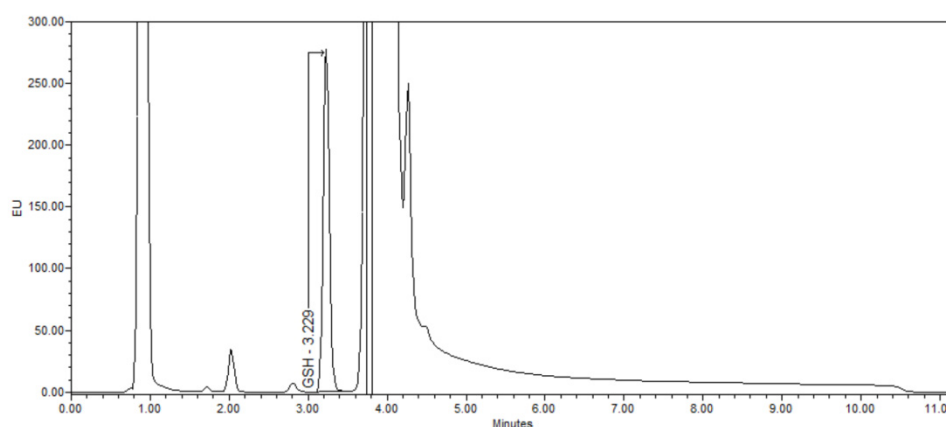

**Figure S2.** Chromatogram of a rat plasma sample from PC group for determination of total GSH. PC – hydroalcoholic solution + acrylamide group (12.5% (v/v) hydroalcoholic solution (7 mL/kg/day) + acrylamide (250 µg/kg of weight, 1% (m/v) aqueous solution)).

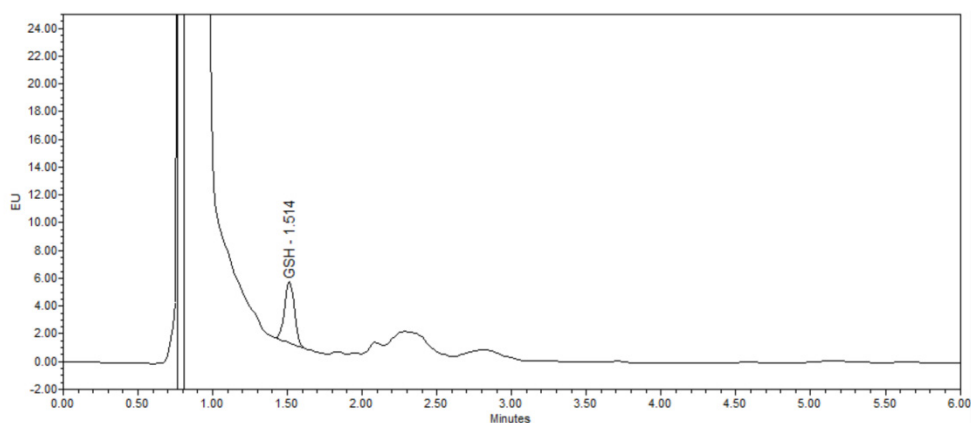

**Figure S3.** Chromatogram of a rat plasma sample from RW + ACR group for determination of reduced GSH. RW + ACR – red wine + acrylamide group (FN<sub>Toh2010</sub> red wine (7 mL/kg/day) + acrylamide (250 µg/kg of weight, 1% (m/v) aqueous solution)).

## 2. Tables

**Table S1.** The average body weight of rats from the 6 experimental groups at the beginning and at the end of the 28 experimental days.

|                         | Experimental groups        |                            |                            |                            |                            |                            |
|-------------------------|----------------------------|----------------------------|----------------------------|----------------------------|----------------------------|----------------------------|
|                         | C                          | PC                         | WW                         | WW + ACR                   | RW                         | RW + ACR                   |
| Initial body weight (g) | 140.60 ± 1.80 <sup>a</sup> | 149.90 ± 2.13 <sup>b</sup> | 142.50 ± 3.01 <sup>a</sup> | 157.11 ± 3.80 <sup>b</sup> | 144.00 ± 3.16 <sup>a</sup> | 167.70 ± 5.77 <sup>b</sup> |
| Final body weight (g)   | 185.40 ± 4.46 <sup>a</sup> | 191.90 ± 5.24 <sup>a</sup> | 195.0 ± 5.74 <sup>a</sup>  | 204.89 ± 4.09 <sup>a</sup> | 194.80 ± 6.22 <sup>a</sup> | 212.50 ± 4.09 <sup>b</sup> |

Values are expressed as mean ± SEM ( $n = 10$ ). <sup>a,b</sup> Mean values not sharing the same superscript letter within a row are different at  $p < 0.05$ . C – hydroalcoholic solution group; PC – hydroalcoholic solution + acrylamide group; WW – white wine group; WW + ACR – white wine + acrylamide group; RW – red wine group; RW + ACR – red wine + acrylamide group.
